1 AIFS: A novel perspective, Artificial  
2 Intelligence infused wrapper based  
3 Feature Selection Algorithm on High  
4 Dimensional data analysis

5 Rahi Jain<sup>1¶</sup>, Wei Xu<sup>2\*</sup>

6 <sup>1</sup>Biostatistics Department, Princess Margaret Cancer Research Centre, Toronto, Ontario, Canada

7 <sup>2</sup>Dalla Lana School of Public Health, University of Toronto, Toronto, Ontario, Canada

8 \* Corresponding author

9 Email: [wei.xu@uhnres.utoronto.ca](mailto:wei.xu@uhnres.utoronto.ca) (WX)

10

11

## 12 Abstract

13 **Background:** Feature selection is important in high dimensional data analysis. The wrapper approach  
14 is one of the ways to perform feature selection, but it is computationally intensive as it builds and  
15 evaluates models of multiple subsets of features. The existing wrapper approaches primarily focus  
16 on shortening the path to find an optimal feature set. However, these approaches underutilize the  
17 capability of feature subset models, which impacts feature selection and its predictive performance.

18 **Method and Results:** This study proposes a novel Artificial Intelligence infused wrapper based  
19 Feature Selection (AIFS), a new feature selection method that integrates artificial intelligence with  
20 wrapper based feature selection. The approach creates a Performance Prediction Model (PPM) using  
21 artificial intelligence (AI) which predicts the performance of any feature set and allows wrapper  
22 based methods to predict and evaluate the feature subset model performance without building  
23 actual model. The algorithm can make wrapper based method more relevant for high-dimensional  
24 data and is flexible to be applicable in any wrapper based method. We evaluate the performance of  
25 this algorithm using simulated studies and real research studies. AIFS shows better or at par feature  
26 selection and model prediction performance than standard penalized feature selection algorithms  
27 like LASSO and sparse partial least squares.

28 **Conclusion:** AIFS approach provides an alternative method to the existing approaches for feature  
29 selection. The current study focuses on AIFS application in continuous cross-sectional data.  
30 However, it could be applied to other datasets like longitudinal, categorical and time-to-event  
31 biological data.

## 32 Keywords

33 High dimensional data, wrapper feature selection, artificial intelligence, AIFS, machine learning,  
34 interaction terms

## 35 Background

36 Large feature space ( $p$ ) is an important aspect of high dimensional data owing to the risk of model  
37 overfitting and poor model generalizability [1] and increased computational complexity [2, 3].  
38 Feature selection is a solution which reduces the input feature space to smaller feature space ( $q$ ) in a  
39 given dataset of sample size ( $n$ ), which provides a parsimonious best fit model for the outcome,  $y$ .

$$y = f(q) \mid q \in (p) \#(1)$$

$$\min \varphi(y, f(q))$$

40 where,  $f$  represents the model function, and  $\varphi$  represents the error function. The approaches  
41 adopted for feature selection can be categorized into two groups. The first and simpler approach  
42 uses expert opinion for feature selection where features are selected using domain knowledge [4, 5]  
43 and allows feature selection before evaluating the data. This approach has limitation or no  
44 applicability if a feature has no or little availability of domain information, high dimensional feature  
45 space and/or presence of interactions among the features [6].

46 The second and prominent approach uses the sampled data to perform the feature selection which  
47 is broadly classified into filter, embedded and wrapper methods [7–9]. These methods could be used  
48 in supervised, semi-supervised or unsupervised learning frameworks [9–11]. Filter methods rely on  
49 the internal data structure of the features for selecting features. Commonly, information gain based  
50 techniques are used for univariate filtering of features [9, 12] and correlation based techniques are  
51 used for multivariate filtering of features [13]. They are computationally efficient, but interactions  
52 between the features may hinder the model performance. Embedded methods incorporate feature  
53 selection within the model building step by adding a penalization step in the model building process.  
54 They are efficient and have the ability to handle interactions between the features. LASSO based  
55 techniques [14–16] are commonly used for linear combination models, while tree-based algorithm  
56 [17] are used in non-linear combination models. Wrapper methods use an iterative approach where

57 a model is built using a subset of features in which the performance is evaluated [18, 19]. The  
58 process is repeated until the best performance is obtained. It provides better performance than  
59 other methods, but it has a higher computational cost.

60 Most techniques have focused on reducing the computational cost of wrapper based methods by  
61 designing algorithms that reduce the optimization route to the target feature set  $q$ , i.e., using the  
62 minimum number of iterations to get  $q$ . The studies achieve this objective by focusing on the  
63 sampling of feature subset. Feature subset sampling step is commonly performed using either  
64 random sampling, sequential sampling or evolutionary sampling [20–23]. The random sampling  
65 approach arbitrarily generates the feature subset [20]. The sequential sampling approach adds or  
66 removes a feature sequentially from a feature set like forward sampling and backward sampling [18,  
67 21]. The evolutionary sampling approach selects the feature subset based on the performance of  
68 features in the previous subset like genetic algorithm [22] and swarm optimization [23]. The number  
69 of iterations is an important bottleneck in improving the computation efficiency of the wrapper  
70 methods.

71 The wrapper methods assume that feature subset with target features should provide better  
72 performance than other feature subsets. Thus, the wrapper methods build models to estimate the  
73 performance for evaluation. The need to build a model for every single feature subset obtained in  
74 the sampling step creates another critical bottleneck in reducing computational complexity. Our  
75 research suggests that model building may not be the only approach to obtain performance value.

76 Currently, the existing wrapper methods partially or entirely discard the unselected models of  
77 feature subset in selecting the next population of feature subsets. Individually, each model may only  
78 be useful in providing performance information, but in combination, these models could help in  
79 identifying hidden relationships that could help in predicting the performance of unknown feature  
80 subset models. This may eliminate the need for building models for every single feature subset  
81 obtained in the sampling step. Accordingly, this study focuses on reducing the number of models

82 that need to be built for a given number of feature subsets obtained in the sampling step of wrapper  
83 based feature selection.

84 In this study, we propose a novel Artificial Intelligence infused wrapper based Feature Selection  
85 (AIFS) algorithm. This algorithm can predict the performance of a feature subset using an existing  
86 artificial intelligence (AI) model rather than estimates the performance of a feature subset by  
87 building an actual AI model (like LASSO, Random Forest). AIFS is unique in many ways. Firstly, it is  
88 unique in its perspective as, unlike classical wrapper approaches of building models for every feature  
89 subset provided by feature subset sampling step, it builds models for only a fraction of the feature  
90 subset. Secondly, it provides a unique application of AI models, that are used to replace the AI  
91 model-based performance estimation step with AI model-based performance prediction step, which  
92 may reduce the computation time. Thirdly, AIFS is versatile, which allows its integration with existing  
93 statistical and machine learning techniques.

94 This paper provides the “Conceptual Framework” section to explain the basic framework of AIFS.  
95 The “Methodology” section explains the AIFS algorithm used in this paper. The algorithm  
96 performance is evaluated and compared against the existing feature selection methodologies for  
97 simulations and real studies in the “Simulation Studies” and “Real Studies” sections. Finally, we  
98 summarize and provide future directions for research in the “Conclusion and Discussion” section.

## 99 Results

100 The performance of AIFS is evaluated and compared with standard methods like LASSO, adaptive  
101 LASSO, group LASSO, sparse partial least squares, elastic net and adaptive elastic net for both the  
102 simulated datasets and real data studies.

### 103 Simulation Studies

104 We perform simulation studies to evaluate the proposed method and compare its performance with  
105 other feature selection methods. The study uses multivariate normal distributions to generate high-

106 dimensional datasets for marginal and interaction models. The regression model,  $y = \beta_0 +$   
 107  $\sum_{i=1}^p \beta_i x_i + \epsilon$  and  $y = \beta_0 + \sum_{i=1}^p \beta_i x_i + \frac{1}{2} \sum_{i \neq j, i=1, j=1}^{i=p, j=p} \beta_{ij} x_{ij} + \epsilon$  provides the outcome variable of  
 108 the simulated data for marginal and interaction models, respectively.  $\epsilon \sim N(0, \sigma^2)$ ,  $x_i \sim N(0, 1)$  and  
 109  $\{x_{ij}\}$  represents the pairwise interactions between features  $\{(x_1, x_2), (x_1, x_3), \dots, (x_{p-1}, x_p)\}$ . In  
 110 the current study, only two-way interactions are considered for demonstration purposes, but it  
 111 could be easily extended to higher-order interactions. Correlation is added between the first 15  
 112 features out of  $p$  marginal features using the covariance matrix as given below.

$$\begin{bmatrix} x_1 x_1 & \cdot & x_1 x_{15} & \cdot & \cdot & x_1 x_p \\ \cdot & \cdot & \cdot & \cdot & \cdot & \cdot \\ x_{15} x_1 & \cdot & x_{15} x_{15} & \cdot & \cdot & x_{15} x_p \\ \cdot & \cdot & \cdot & \cdot & \cdot & \cdot \\ x_p x_1 & \cdot & x_p x_{15} & \cdot & \cdot & x_p x_p \end{bmatrix} = \begin{bmatrix} 1 & \cdot & 5 & \cdot & \cdot & 0 \\ \cdot & \cdot & 5 & \cdot & \cdot & \cdot \\ 5 & 5 & 1 & \cdot & \cdot & 0 \\ \cdot & \cdot & \cdot & \cdot & \cdot & \cdot \\ 0 & \cdot & 0 & \cdot & \cdot & 1 \end{bmatrix}$$

113 Multiple scenarios are created with the different number of noise features (Table 1). Non-zero  $\beta$   
 114 value is assigned only to the true features. The AIFS approach is implemented both with and without  
 115 a performance-based filter step. The final predictive model from selected features is prepared using  
 116 either RIDGE regression (AIFS-LR) or non-penalized linear regression (AIFS-LLr). When no  
 117 performance-based filter step is performed, model obtained from embedded feature selection stage  
 118 is used as the final predictive model and is referred to as AIFS-L technique.

## 119 Computation Time estimation

120 We estimate computation time of the AIFS algorithm under different scenarios on a system with  
 121 processor Intel® Core (TM) i7-8750H CPU@2.20GHz with 16 GB RAM on a Windows 10 64-bit  
 122 operating system. The computation time is compared with the standard wrapper based approach  
 123 that did not have the Performance Prediction Model (PPM). Since, standard wrapper (StW) does not  
 124 have performance-based feature selection step, we compare it with AIFS-L method. Further, we add  
 125 embedded feature selection step in StW. Thus, any performance difference is only associated with  
 126 PPM model. Genetic algorithm is used to generate samples in feature subset sampling step with  
 127 maximum number of iterations fixed to 200. Multiple scenarios are created for the comparative

128 analysis of two algorithms (Table 1). The training datasets vary from 50-100 samples, while the test  
129 datasets contain 500 samples. In each scenario, training samples and test samples are independent  
130 samples that came from same distribution. Along with computation time, we evaluated both  
131 methods on their ability to select the target features and predictive performance of selected  
132 features. F1 score is used to determine the accuracy of selecting target features. Root Mean Square  
133 Error (RMSE) from the test data is used to determine the predictive performance of the model  
134 obtained from the embedded feature selection step. All the analysis is conducted using R 4.0.3 [24].

135 In both the marginal and interaction models (Table 2), AIFS consumed more time as compared to  
136 standard wrapper approach. This is counter intuitive, but this behavior is possible due to the PPM  
137 model upgradation step in AIFS. During each upgrade, sample size used for training PPM model  
138 increases. The current approach uses random forest to update PPM model and uses LASSO to build  
139 the base model. LASSO needs to build the model on a sample size of 50 or 100 but random forest  
140 needs to build a PPM model using at least 225 samples (Model 1\_I) with sample size increasing  
141 during the execution of genetic algorithm.

142 However, AIFS has a better or at par ability to discriminate between the target and noise features,  
143 especially for interaction models as compared to standard wrapper method. Similarly, predictive  
144 performance of the features shortlisted from AIFS is better or at par with standard wrapper method,  
145 especially for high dimensional data and interaction models. AIFS performance suggests that this  
146 methodology framework can be used as an alternative to the standard wrapper framework.

147 AIFS comparison with standard methods

148 AIFS performance is compared with existing standard penalized regression methods namely LASSO,  
149 adaptive LASSO (ALASSO), group LASSO (GLASSO), elastic net (Enet), adaptive elastic net (AEnet) and  
150 sparse partial least squares (SPLS) in ten different trials. GLASSO is used only for interaction models.  
151 All the analysis is conducted using R 4.0.3 [24]. The standard methods are run using the inbuilt  
152 packages in statistical language R. *glmnet* package [25] is used for most methods except GLASSO and

153 SPLS for which *glinternet* [26] and *spls* [27] packages were used. In the case of adaptive models,  
154 adaptive weights are obtained from ridge regression [28]. In the case of interaction models, all  
155 possible two-way interaction terms were created and entered the model. AIFS is implemented using  
156 the algorithm programmed in R.

157 The AIFS and the standard methods are evaluated on target feature selection and prediction  
158 performance. We evaluate the method's ability to discriminate between true and noise features by  
159 measuring the selection of true features and rejection of noise features. We use RMSE from the test  
160 data as the predictive performance metric.

161 Table 3 shows the feature selection performance of different methods for marginal models. All  
162 methods have selected the targeted ten features which means that they can identify the target  
163 features in the marginal dataset. However, in most cases, the number of selected features is much  
164 higher, indicating that methods also select noise features. Compared to standard methods, the AIFS  
165 method selected a similar or lesser number of noise features which suggests that it has better  
166 discrimination ability between noise and target features than standard methods. Further, results  
167 from Figure 1 indicates better discrimination ability of the AIFS method than the standard methods.  
168 It is shown that frequency of selecting a noise feature is consistently lesser than the target features  
169 in all methods, but the maximum separation is found only for AIFS method. In addition, the area  
170 under curve (AUC) of the features was higher for AIFS method as compared to standard methods.  
171 Thus, in the case of marginal datasets, while all methods can identify the target features, AIFS  
172 outperforms all other methods with a lesser selection of noise features.

173 The results from the interaction models reiterate the results of the marginal scenario that the  
174 feature selection performance of AIFS is better or at par with the standard methods. Table 4 shows  
175 that like marginal models the number of features selected by all methods is more than the number  
176 of target features in most cases. This suggests that noise features are selected by all methods, but  
177 the number of noise features selected differs with methods. AIFS method selects a similar or lesser



178 number of noise features compared to the standard methods, and results from Figure 2 suggest that  
179 AIFS may be selecting a lesser number of noise features compared to other methods. The results  
180 show that in low dimensional space, all methods can discriminate between the target and noise  
181 features by selecting the target features at a higher frequency as compared to noise features.  
182 However, in very high dimensions, only AIFS and GLASSO can perform. AUC performance of different  
183 methods also shows better or at par performance of AIFS as it can predict the target and noise  
184 features with greater or similar accuracy than other methods.

185 In AIFS, we used existing classic statistical techniques. The use of statistical techniques could have an  
186 important influence on the wrapper method performance [29]. However, a performance comparison  
187 between LASSO technique used in AIFS and as a standalone feature selection method clearly showed  
188 that AIFS could improve the LASSO performance. The AIFS performance suggests that the proposed  
189 methodology could enhance the feature selection performance of the existing statistical techniques  
190 by reducing the feature space and increasing the target feature percentage.

191 Table 5 shows the prediction performance of different methods. RMSE performance of the tested  
192 methods suggests that AIFS method performs consistently better or at par with the existing  
193 methods. In low dimensionality data (2\_M, 4\_M and 1\_I), it is expected that all methods should give  
194 similar performance as standard methods are primarily developed for handling low dimensionality  
195 data, and results support it. AIFS method can provide better performance even in high dimensional  
196 settings (1\_M and 3\_M) and in the presence of interaction terms (2\_I). However, at very high  
197 dimensional data (3\_I), all methods perform poorly. These findings suggest that the AIFS may  
198 provide better or at par prediction performance than existing methods. Overall, the proposed  
199 method could expand the capability of existing techniques like non-penalized regression to operate  
200 in high-dimensional settings. However, computational intensiveness will be a significant limitation  
201 for the proposed methodology compared to standard methods. In summary, when we compare the  
202 performance of FS methods across different data dimensionality, performance of all methods

203 deteriorates with an increase in data dimensionality, but performance of most standard methods  
204 decreases more drastically than AIFS.

## 205 Real Studies: Population Health Data

206 Four real studies are analyzed to evaluate the performance of AIFS and existing methods.  
207 Community Health Status Indicators (CHSI) study focuses on non-communicable diseases from US  
208 county with data (n=3141) containing 578 features [30] (Study I). National Social Life, Health and  
209 Aging Project (NSHAP) datasets focusing on the health and well-being of aged Americans contains  
210 multiple datasets. We chose two datasets (Study II and Study III) containing data for 4377 residents  
211 on 1470 features [31] and 3005 residents on 820 features [32]. Study IV is the Study of Women's  
212 Health Across the Nation (SWAN), 2006-2008 dataset focusing on 887 *physical, biological,*  
213 *psychological and social* features in middle-aged women in the USA (n = 2245) [33].

214 The raw data of the real studies are processed for ease of analysis to obtain final cleaned datasets  
215 (Table 6). Features and samples are filtered to remove highly correlated features, non-continuous  
216 features, and missing values. Then, each dataset is randomly split into training and testing datasets.  
217 As the sample size is large, only 20% of data is used for training while remaining 80% of data is used  
218 for testing to create a high dimensional data setting. We compare the performance of different  
219 methods for marginal models and interaction models using mean RMSE of the test data in ten trials.

220 Table 7 summarizes the feature selection results. It is shown that standard methods are selecting a  
221 lesser number of features as compared to AIFS methods. However, the results from the previous  
222 simulated data studies suggest that standard methods may struggle to discriminate between target  
223 and noise features (Figure 1 and Figure 2). Further, the predictive performance results of AIFS  
224 method is better than the standard methods for both marginal as well as interaction models (Table  
225 8). The better performance of the proposed method suggests that it may be more reliable than  
226 standard methods in identifying the target features.

227 The results show that in Study III, marginal models performed better than their interaction models  
228 for all methods. Better performance of the marginal model compared to the interaction model  
229 suggests that AIFS cannot completely reject noise features and is sensitive to an increase in feature  
230 space. However, AIFS is still more robust than standard methods and can perform in different  
231 dimensions and datasets.

#### 232 Real Studies: Genomic Data

233 AIFS-L method is compared with StW method in the genomic datasets to determine the biological  
234 relevance of the solutions obtained from AIFS method. In many cancer studies, it is found that  
235 smoking can be detrimental to the cancer patient health [34, 35]. Further, an association between  
236 gene expression levels and cancer patient smoking habit has been reported [36]. Thus, it would be  
237 relevant to identify the genes in cancer patients which are associated with smoking-related traits. In  
238 this study, The Cancer Genomic Atlas (TCGA) program is used to get the data from nine cancer  
239 projects (Table 9) which maintained records related to amount smoked and gene expression profile  
240 of patients [37]. The sample size  $n$  for these projects range from 89 to 592 samples with feature  
241 space  $p$  of 56602 genes. The gene expression profile is used as the input feature space and number  
242 of cigarettes smoked per day (CPD) is used as the outcome.

243 Preliminary processing of all datasets is performed to reduce the input feature space and remove  
244 samples with missing values. The input feature space is reduced from 56602 to 50 features through  
245 multi-stage processing (Table 9). Step one involved removing the features which are not  
246 differentially expressed in cancer patients as compared to normal patients using *TCGAbiolinks*  
247 package [38]. Step two involved supervised dimensionality reduction of the differentially expressed  
248 genes using partial least squares technique and select top 100 features with highest absolute  
249 weights in first latent feature. Step three involved removing correlations among the features. Thus,  
250 among any pair of features with more than 0.8 absolute correlation, one feature is randomly  
251 selected. Step four involves selecting the top 50 features among the non-correlated features based

252 on their absolute weight in the first latent feature obtained in step two. No interaction effects are  
253 considered for this analysis.

254 The performance of AIFS and StW in all datasets is compared on three metrics namely predictive  
255 performance, computation time and number of genes selected. The results are based on 10-fold  
256 cross-validation (Table 10). It observed that in all the datasets the predictive performance of AIFS  
257 based features is better or at par with StW based features. Further, it is observed that a smaller set  
258 of features are selected by AIFS as compared to StW which suggests AIFS could provide a more  
259 parsimonious set of features as compared to StW without compromising on the predictive  
260 performance of the features. In terms of computation time, the results are similar to those observed  
261 in simulation studies with StW taking less time than AIFS in most cases.

262 In order to assess the biological relevance of the genes selected by each method, selected genes of  
263 each dataset are pooled together to create final list of genes selected by each method. The results  
264 show that some genes are selected at a very high frequency in dataset during 10-fold feature  
265 selection process. Genes need to fulfill one of the two criteria of either having highest selection  
266 frequency or selection frequency of more than 80%. Accordingly, across nine datasets, AIFS provided  
267 13 genes while StW provided 40 genes. 11 genes (VCX3A, WNT3A, CALHM5, ZMYND10, FOXE1, PLAT,  
268 BAAT, WFDC5, CGB5, FADD, APOE) are found to be common across the two methods. Among the 13  
269 genes from AIFS method, seven genes (WNT3A [39], TMEM45A [40], BAAT [40], WFDC5 [41], HS3ST5  
270 [42], CGB5 and APOE [43]) have been reported in literature to exert influence on tobacco or  
271 smoking-related traits. Further, AIFS identified six new genes (VCX3A, CALHM5, ZMYND10, FOXE1,  
272 PLAT, FADD) which could be related to smoking in cancer patients, thus providing an opportunity for  
273 identifying previously unknown biological functions.

## 274 Discussion

275 Building models for each sample feature set obtained during the feature sampling stage of wrapper  
276 methods consume computational resources and may not always provide the best results. AIFS allows  
277 skipping the model building for many sample feature sets by training an AI model, i.e., the PPM  
278 model, which could predict the performance of sample feature sets. AIFS feature selection  
279 performance and predictive performance are better or at par than both the standard wrapper  
280 approach and penalized standard methods, namely LASSO, adaptive LASSO, group LASSO, Sparse  
281 PLS, Elastic net and adaptive elastic net.

282 The proposed method has certain limitations. The current study primarily focuses on testing the  
283 concept; thus, the study performed testing on limited datatypes. Future research could focus on  
284 evaluating the robustness of the approach using different types of data such as temporal data and  
285 categorical data, and outcomes such as binary outcomes and time to event outcomes. Other than  
286 data types, the focus could also be directed towards the algorithm used. Currently, the study uses a  
287 linear combination function for building actual models, but future studies could also explore the  
288 non-linear combination function for model building. Further, the current study reduced the need to  
289 build actual models in the wrapper approach but could not eliminate it. Therefore, future research  
290 could use other PPM building techniques like an artificial neural network and support vector  
291 machines to eliminate the need for actual models.

## 292 Conclusion

293 In the paper, we propose AIFS, an innovative approach to perform wrapper based feature selection.  
294 The method is flexible enough to work with both marginal and interaction terms. The approach  
295 could be easily embedded with any of the wrapper techniques as it does not alter existing methods,  
296 which allows users to integrate the method in their existing wrapper pipelines. This approach could  
297 enhance the performance of existing wrapper techniques available in the literature for high

298 dimensional datasets by accelerating the algorithm. AIFS can identify both the marginal features and  
299 interaction terms without using interaction terms in PPM, which could be critical in reducing the  
300 feature space an algorithm has to process.

301 The benefits of AIFS comes from using artificial intelligence to learn the dataset performance  
302 behavior and build the PPM, which replaces the actual model building process. The studies involving  
303 marginal effects with and without interaction effects in simulated data showed that AIFS could  
304 outperform existing methods in feature selection and prediction performance. Similar performance  
305 in real datasets also demonstrates the practical relevance of AIFS.

## 306 Conceptual Framework

307 In a wrapper approach, given a dataset  $D$  of sample size  $n$  with  $p$  feature space and outcome  $y$ , a  
308 subset feature set  $q$  is created from  $p$ . In the standard wrapper approach (Figure 3a), a model is built  
309 for the subset of  $D$  containing  $q$  features and performance is estimated. This performance is used to  
310 select the next subset of  $p$ . This dependence of a standard wrapper approach upon model building  
311 step for each subset of feature to estimate its performance is targeted in our AIFS algorithm.

312 The conceptual framework used to design AIFS algorithm (Figure 3b) aims at reducing (or removing)  
313 the dependence of the wrapper algorithm on model building step for obtaining performance value  
314 of  $q$ . AIFS algorithm creates a random set  $q_{AI} = \{q_{AI_j} \mid q_{AI_j} \in \{\{1\}, \dots, \{1, \dots, p\}\}, j \in \{1, \dots, k\}$  of  
315  $k$  feature samples, where each feature sample is a subset of  $p$ . The algorithm builds a model for  $q_{AI}$   
316 samples to estimate their performance  $C = \{C_j\}$ . The algorithm creates a Performance Prediction  
317 Model (PPM) with  $q_{AI}$  as the input and  $C$  as the outcome using a machine learning model to enable  
318 performance prediction of any subset of  $p$ . Finally, the algorithm executes the standard wrapper  
319 approach, but uses PPM as a surrogate to the actual model building step that predicts rather than  
320 estimates the actual performance of  $q$ .

## 321 Methodology

322 This section explains the design of AIFS algorithm based on the conceptual framework. The  
 323 algorithm can be divided into four steps: performance prediction model, wrapper based coarse  
 324 feature selection, embedded-feature selection and performance-based feature selection (Figure 4).

### 325 Performance Prediction Model (PPM)

326 The algorithm generates  $k$  random sample datasets containing  $q_{AI_j}$  features, and sample size  $n$  from  
 327  $D$ . A set of models  $M = \{m_j\}$  are created from  $k$  sample datasets for an outcome,  $y$  using any  
 328 modeling technique.

$$m_j: y_j = f(q_{AI_j}) \mid j \in \{1, \dots, k\} \#(2)$$

329 A performance set  $C = \{C_j\}$  contains the performance of  $M$  models. The algorithm creates a  
 330 performance dataset  $D_{perf}$ , a matrix of features used in each model of  $M$  ( $q_f$ ) and their  
 331 performance,  $C$ .

$$D_{perf} = |q_{f_{ij}} \quad c_j| |q_{f_{ij}} = \begin{cases} 0, & q_{AI_{ij}} \notin \{m_j\}, i \in \{1, p\}, j \in \{1, \dots, k\} \\ 1, & q_{AI_{ij}} \in \{m_j\}, i \in \{1, p\}, j \in \{1, \dots, k\} \end{cases} \#(3)$$

332 As shown in equation 3, feature matrix ( $q_f$ ) is a binary matrix that consists of  $p$  columns and  $k$  rows.  
 333 The matrix takes the value of 0 for  $i^{th}$  column and  $j^{th}$  row, if  $i^{th}$  feature is not used in  $m_j$  model,  
 334 else  $i^{th}$  column and  $j^{th}$  row takes the value of 1. PPM is constructed from  $D_{perf}$  to provide a  
 335 predictive model for the outcome,  $C$  using any machine learning technique.

$$PPM: C = f(q_f) \#(4)$$

336 In this study, we have used LASSO to prepare  $m_j$  models and random forest to build the PPM.  
 337 During the preliminary analysis (Additional File 1), it is found that predicted performance and actual  
 338 performance is strongly and positively correlated, but predicted performance may not match the

339 actual performance, as a result subset corresponding to best predicted performance may not be the  
340 best subset.

### 341 Wrapper based coarse feature selection

342 The standard wrapper approach as shown in Figure 3a is an iterative process where a subset of  
343 feature is evaluated, and performance of the feature subset is used to select the next subset of  
344 features. In our work, we used genetic algorithm to search through the feature space iteratively as it  
345 is used in wide range of datasets [44–46]. In the proposed algorithm, we use PPM for all iterations to  
346 predict the performance  $C_{pred}$  of a feature set  $q$ . Since, we found that best  $C_{pred}$  may correspond to  
347 one of the high performing feature sets but not the best feature set, we validate  $C_{pred}$  values by  
348 building a model using  $q$  features to estimate the performance  $C_{true}$  (Figure 4). The algorithm uses  
349 user-defined criteria  $val_{crit}$  to select sample feature sets for validation of  $C_{pred}$  values.

350 In this study, the top quartile of  $C$  is used as the  $val_{crit}$  criterion, thus  $q$  with  $C_{pred}$  in top quartile of  
351  $C$  are selected for model building.  $D_{perf}$  is updated with feature set  $q$  whose  $C_{true}$  value is available  
352 and consequently, is used to update PPM. The iteration stops when we get  $q_{wrap}$  features, which  
353 provide the best performance.

### 354 Embedded feature selection

355 The  $q_{wrap}$  features obtained from the wrapper step are processed to obtain the final features  
356 because the prediction model does not explicitly provide the non-linear combinations of  $q_{wrap}$   
357 features. Thus, an embedded feature selection model is used on  $q_{wrap}$  features for an outcome,  $y$   
358 which allows the additional features  $\chi$  like interactions terms to be incorporated. LASSO framework  
359 is used as the embedded model in the proposed algorithm.

### 360 Performance-based feature selection

361 The features selected from the embedded model  $q_{embed}$  undergo the last stage of processing to  
362 provide final features  $q$ . This step selects features based on their contribution to the model



363 performance.  $l$  models  $m_{perf_l}: y_j = f(q_{embed} - l) | l \in \{1, \dots, q_{embed}\}$  are prepared with each  
364 model containing  $q_{embed} - 1$  features.  $l$  feature importance is determined from the  $m_{perf_l}$   
365 performance.

366 To obtain  $l$  feature robust importance, we create multiple models using bootstrapping of samples,  
367 and their performance  $\hat{c}^j$  is pooled to get overall model performance  $\hat{c}_{pool_j}$ . In this study, we use  
368 RIDGE regression for model building as we are focusing on high dimensional data and non-penalized  
369 linear regression could only work for cases with  $q_{embed} < n$ . Goodness of fit ( $R^2$ ) of out of the bag  
370 (OOB) samples is used as the performance metric. Finally, the performance metric is pooled to  
371 provide a coefficient of variation of  $R^2$  as the overall model performance for  $l$  feature.

372 A performance threshold  $c_{cutoff}$  needs to be defined to select the features. Rather than using an  
373 arbitrary threshold, our algorithm uses a dynamic cutoff. The algorithm tries different performance  
374 thresholds and selects the threshold which provides the best performance  $c_{best}$  for the smallest  
375 feature space  $q_{best}$ . In the current study, we use genetic algorithm to search through the  
376 performance threshold space. Two different techniques, namely non-penalized regression and  
377 adaptive RIDGE regression are used for the model building. Pseudo Algorithm summarizes the  
378 complete AIFS algorithm.

**Pseudo Algorithm: AIFS**

Input: Feature data  $X$  ( $p \times n$ )  
Target feature  $Y$  ( $1 \times n$ )  
Number of feature samples  $k$   
PPM performance prediction validation criteria  $val_{crit}$   
Number of bootstrap replicates  $B$   
Performance dataset  $D_{perf} = \{empty\}$   
Wrapper based coarse selected features list  $q_{wrap} = \{empty\}$   
Embedded method based selected features list  $q_{embed} = \{empty\}$   
Output: Final Feature set  $q_{best}$   
**Begin:**  
# Step 1: Performance Prediction Model  
**for**  $i=1$  **to**  $k$  **do**  
Generate  $q_{AI}^i$  random features from  $p$   
Generate samples  $(X^i, Y^i \in R^{n \times (q_{AI}^i + 1)})$

```

    Build embedded model (like LASSO) from  $(X^i, Y^i)$ 
    Compute performance estimate  $C^i$  of the model
    Add  $(q_{AI}^i, C^i)$  to  $D_{perf}$ 
end for
Build a supervised machine learning model, PPM from  $D_{perf}$ 

# Step II: Wrapper based Coarse Feature Selection
Initialize a random sample feature set  $q$ 
while  $C^q < C^{best}$  do
    Predict  $q$  performance using PPM
    if  $q$  fulfils  $val_{crit}$ 
        Build embedded model (like LASSO) from  $(X^q, Y^q \in R^{n \times (q+1)})$ 
        Compute performance estimate  $C^q$  of the model
        if  $C^q = C^{best}$ 
             $q^{wrap} = q$ 
        end while
    else
        Add  $(q, C^q)$  to  $D_{perf}$ 
        Update PPM from  $D_{perf}$ 
end while

# Step III: Embedded Feature Selection
Compute embedded model (like LASSO) estimate  $\hat{w}_{efs}$  from  $(X, Y \in R^{n \times (q_{wrap}+1)})$ 
for  $j=1$  to  $q_{wrap}$ 
    if  $\hat{w}_{efs}^j \neq 0$ 
        Add  $j$  to  $q_{embed}$  feature list
    end for
Add missing marginal features for selected interaction terms in  $q_{embed}$  to get final feature selection

# Step IV: Performance-based feature selection
for  $i=1$  to  $q_{embed}$ 
    Select all  $q_{embed}$  features  $q$  except  $i$  feature and its interaction terms
    for  $j=1$  to B
        Compute statistical model (like RIDGE) performance  $\hat{c}^j$  from  $(X, Y \in R^{n \times (q+1)})$ 
    end for
    Compute pooled performance estimate  $\hat{c}_{pool_j}$ 
    Rank  $q_{embed}$  such that feature with highest  $\hat{c}_{pool_j}$  is considered best feature
end for
Initialize random performance cut off value  $c_{cutoff}$ 
while  $c_{model} < c_{best}$  do
    Select  $q$  features such that  $\hat{c}_{pool_q} \geq c_{cutoff}$ 
    Compute statistical model (like RIDGE and linear regression) performance  $c_{model}$  from
     $(X, Y \in R^{n \times (q+1)})$ 
end while
End

```

379

## 380 List of abbreviations

381 AEnet: Adaptive Elastic Net

382 AI: Artificial Intelligence

383 AIFS: Artificial Intelligence infused wrapper based Feature Selection

384 ALASSO: Adaptive LASSO

385 AUC: Area Under Curve

386 CHSI: Community Health Status Indicators

387 Enet: Elastic Net

388 GLASSO: Group LASSO

389 NSHAP: National Social Life, Health and Aging Project

390 OOB: Out Of the Bag

391 PPM: Performance Prediction Model

392 RMSE: Root Mean Square Error

393 SPLS: Sparse Partial Least Squares

394 StW: Standard Wrapper

395 SWAN: Study of Women's Health Across the Nation

## 396 Declarations

397 Ethics approval and consent to participate

398 Not Applicable

399 Consent for publication

400 Not Applicable

401 Availability of data and materials

402 All the datasets and code are in the github link: <https://github.com/rahijaingithub/AIFS>.

403 Competing interests

404 The authors declare that they have no competing interests

405 Funding

406 W.X. was funded by Natural Sciences and Engineering Research Council of Canada (NSERC Grant  
407 RGPIN-2017-06672) as principal investigator, R.J. and W.X. were funded by Prostate Cancer Canada  
408 (Translation Acceleration Grant 2018) as trainee and investigator.

409 Author Contributions

410 ALL AUTHORS HAVE READ AND APPROVED THE MANUSCRIPT.

411 **Conceptualisation:** RJ, WX

412 **Formal Analysis:** RJ

413 **Investigation:** RJ

414 **Methodology:** RJ, WX

415 **Software:** RJ

416 **Supervision:** RJ, WX

417 **Validation:** RJ, WX

418 **Writing-original draft:** RJ

419 **Writing-review & editing:** RJ, WX

420 Acknowledgements

421 Not Applicable

422 Reference

- 423 1. Bellman R. Dynamic Programming. *Math Sci Eng.* 1967;40:101–37.
- 424 2. Fan J, Li R. Statistical challenges with high dimensionality: feature selection in knowledge  
425 discovery. In: *Proceedings of the International Congress of Mathematicians Madrid, August 22–30,*  
426 *2006. Madrid; 2007.* p. 595–622.
- 427 3. Ayesha S, Hanif MK, Talib R. Overview and comparative study of dimensionality reduction  
428 techniques for high dimensional data. *Inf Fusion.* 2020;59:44–58.
- 429 4. Walter S, Tiemeier H. Variable selection: Current practice in epidemiological studies. *Eur J*  
430 *Epidemiol.* 2009;24:733–6.
- 431 5. Heinze G, Wallisch C, Dunkler D. Variable selection – A review and recommendations for the  
432 practicing statistician. *Biometrical J.* 2018;60:431–49.
- 433 6. Jain R, Xu W. HDSI: High dimensional selection with interactions algorithm on feature selection  
434 and testing. *PLoS One.* 2021;16:1–17.
- 435 7. Guyon I, Gunn S, Nikravesh M, Zadeh LA. Feature extraction: foundations and applications. Verlag:  
436 Springer; 2008.
- 437 8. Wang S, Celebi ME, Zhang YD, Yu X, Lu S, Yao X, et al. Advances in data preprocessing for bio-  
438 medical data fusion: An overview of the methods, challenges, and prospects. *Inf Fusion.*  
439 *2021;76:376–421.*
- 440 9. Zhang R, Nie F, Li X, Wei X. Feature selection with multi-view data: A survey. *Inf Fusion.*  
441 *2019;50:158–67.*
- 442 10. Cai J, Luo J, Wang S, Yang S. Feature selection in machine learning: A new perspective.  
443 *Neurocomputing.* 2018;300:70–9.
- 444 11. Solorio-Fernández S, Carrasco-Ochoa JA, Martínez-Trinidad JF. A review of unsupervised feature  
445 selection methods. *Artif Intell Rev.* 2020;53:907–48.
- 446 12. Dash M, Liu H, Yao J. Dimensionality reduction of unsupervised data. In: *Proceedings Ninth IEEE*  
447 *International Conference on Tools with Artificial Intelligence. California, USA; 1997.* p. 532–9.
- 448 13. Chormunge S, Jena S. Correlation based feature selection with clustering for high dimensional  
449 data. *J Electr Syst Inf Technol.* 2018;5:542–9.
- 450 14. Tibshirani R. Regression shrinkage and selection via the lasso: A retrospective. *J R Stat Soc Ser B*  
451 *Stat Methodol.* 2011;73:273–82.
- 452 15. Chun H, Keleş S. Sparse partial least squares regression for simultaneous dimension reduction  
453 and variable selection. *J R Stat Soc Ser B Stat Methodol.* 2010;72:3–25.
- 454 16. Jain R, Xu W. RHDSI: A novel dimensionality reduction based algorithm on high dimensional  
455 feature selection with interactions. *Inf Sci (Ny).* 2021;574:590–605.
- 456 17. Lal TN, Chappelle O, Weston J. Embedded Methods. In: Guyon I, Nikravesh M, Gunn S, Zadeh LA,

- 457 editors. Feature Extraction: Foundations and Applications. Berlin, Heidelberg: Springer; 2006. p.  
458 137–65.
- 459 18. Kohavi R, John GH. Wrappers for feature subset selection. *Artif Intell.* 1997;97:273–324.
- 460 19. Tarkhaneh O, Nguyen TT, Mazaheri S. A novel wrapper-based feature subset selection method  
461 using modified binary differential evolution algorithm. *Inf Sci (Ny)*. 2021;565:278–305.
- 462 20. Zhenlei W, Suyun Z, Yangming L, Hong C, Cuiping L, Xiran S. Fuzzy Rough Based Feature Selection  
463 by Using Random Sampling. In: Geng X, Kang B-H, editors. *PRICAI 2018: Trends in Artificial*  
464 *Intelligence*. Nanjing: Springer Cham; 2018. p. 91–9.
- 465 21. Wang A, An N, Chen G, Li L, Alterovitz G. Accelerating wrapper-based feature selection with K-  
466 nearest-neighbor. *Knowledge-Based Syst.* 2015;83:81–91.
- 467 22. Amini F, Hu G. A two-layer feature selection method using Genetic Algorithm and Elastic Net.  
468 *Expert Syst Appl.* 2021;166 October 2020:114072. doi:10.1016/j.eswa.2020.114072.
- 469 23. Ibrahim RA, Ewees AA, Oliva D, Abd Elaziz M, Lu S. Improved salp swarm algorithm based on  
470 particle swarm optimization for feature selection. *J Ambient Intell Humaniz Comput.* 2019;10:3155–  
471 69.
- 472 24. R Core Team. R: A language and environment for statistical computing. 2020. [https://www.r-](https://www.r-project.org/)  
473 [project.org/](https://www.r-project.org/).
- 474 25. Friedman JH, Hastie T, Tibshirani R. Regularization Paths for Generalized Linear Models via  
475 Coordinate Descent. *J Stat Softw.* 2010;33:1–22.
- 476 26. Lim M, Hastie T. *glinternet: Learning Interactions via Hierarchical Group-Lasso Regularization*. R  
477 Packag version 109. 2019.
- 478 27. Chung D, Chun H, Keleş S. Package “spls.” 2019. [https://cran.r-](https://cran.r-project.org/web/packages/spls/spls.pdf)  
479 [project.org/web/packages/spls/spls.pdf](https://cran.r-project.org/web/packages/spls/spls.pdf). Accessed 22 Sep 2020.
- 480 28. Zou H. The adaptive lasso and its oracle properties. *J Am Stat Assoc.* 2006;101:1418–29.
- 481 29. Bajer D, Dudjak M, Zoric B. Wrapper-based feature selection: How important is the wrapped  
482 classifier? *Proc 2020 Int Conf Smart Syst Technol SST 2020*. 2020;:97–105.
- 483 30. [Dataset] Centers for Disease Control and Prevention. Community Health Status Indicators (CHSI)  
484 to Combat Obesity, Heart Disease and Cancer. [Healthdata.gov](https://healthdata.gov). 2012.  
485 [https://healthdata.gov/dataset/community-health-status-indicators-chsi-combat-obesity-heart-](https://healthdata.gov/dataset/community-health-status-indicators-chsi-combat-obesity-heart-disease-and-cancer)  
486 [disease-and-cancer](https://healthdata.gov/dataset/community-health-status-indicators-chsi-combat-obesity-heart-disease-and-cancer). Accessed 6 Aug 2020.
- 487 31. Waite L, Cagney K, Dale W, Hawkey L, Huang E, Lauderdale D, et al. National Social Life, Health  
488 and Aging Project (NSHAP): Wave 3, [United States], 2015-2016 (ICPSR 36873). Inter-university  
489 Consortium for Political and Social Research. 2019. <https://doi.org/10.3886/ICPSR36873.v4>.  
490 Accessed 22 Sep 2020.
- 491 32. [Dataset] Waite LJ, Laumann EO, Levinson WS, Lindau ST, O’Muircheartaigh CA. National Social  
492 Life, Health, and Aging Project (NSHAP): Wave 1, [United States], 2005-2006 (ICPSR 20541). Inter-  
493 university Consortium for Political and Social Research. 2019.  
494 <https://doi.org/10.3886/ICPSR20541.v9>. Accessed 22 Sep 2020.
- 495 33. Sutton-Tyrrell K, Selzer F, Sowers M, Finkelstein J, Powell L, Gold E, et al. Study of Women’s  
496 Health Across the Nation (SWAN), 2006-2008: Visit 10 Dataset. Inter-university Consortium for  
497 Political and Social Research. 2018. <https://doi.org/10.3886/ICPSR32961.v2>. Accessed 8 Jun 2020.

- 498 34. Caliri AW, Tommasi S, Besaratinia A. Relationships among smoking, oxidative stress,  
499 inflammation, macromolecular damage, and cancer. *Mutat Res - Rev Mutat Res*. 2021;787:108365.
- 500 35. Karlsson A, Ellonen A, Irjala H, Väliäho V, Mattila K, Nissi L, et al. Impact of deep learning-  
501 determined smoking status on mortality of cancer patients: never too late to quit. *ESMO Open*.  
502 2021;6:100175.
- 503 36. Loukola A, Hällfors J, Korhonen T, Kaprio J. Genetics and Smoking. *Curr Addict Reports*.  
504 2014;1:75–82.
- 505 37. National Institute of Health. Genomic Data Commons Data Portal. <https://portal.gdc.cancer.gov/>.  
506 Accessed 30 Mar 2022.
- 507 38. Colaprico A, Silva TC, Olsen C, Garofano L, Cava C, Garolini D, et al. TCGAbiolinks: An  
508 R/Bioconductor package for integrative analysis of TCGA data. *Nucleic Acids Res*. 2016;44:e71.
- 509 39. Guo L, Wang T, Wu Y, Yuan Z, Dong J, Li X, et al. WNT/ $\beta$ -catenin signaling regulates cigarette  
510 smoke-induced airway inflammation via the PPAR $\delta$ /p38 pathway. *Lab Invest*. 2016;96:218–29.
- 511 40. Gümüş ZH, Du B, Kacker A, Boyle JO, Bocker JM, Mukherjee P, et al. Effects of tobacco smoke on  
512 gene expression and cellular pathways in a cellular model of oral leukoplakia. *Cancer Prev Res*.  
513 2008;1:100–11.
- 514 41. Zhou D, Sun Y, Jia Y, Liu D, Wang J, Chen X, et al. Bioinformatics and functional analyses of key  
515 genes in smoking-associated lung adenocarcinoma. *Oncol Lett*. 2019;18:3613–22.
- 516 42. Ivorra C, Fraga MF, Bayón GF, Fernández AF, Garcia-Vicent C, Chaves FJ, et al. DNA methylation  
517 patterns in newborns exposed to tobacco in utero. *J Transl Med*. 2015;13:1–9.
- 518 43. Rouillard AD, Gundersen GW, Fernandez NF, Wang Z, Monteiro CD, McDermott MG, et al. The  
519 harmonizome: a collection of processed datasets gathered to serve and mine knowledge about  
520 genes and proteins. *Database (Oxford)*. 2016;1:1–16.
- 521 44. Abdel-Basset M, Abdel-Fatah L, Sangaiyah AK. *Metaheuristic algorithms: A comprehensive review*.  
522 Elsevier Inc.; 2018.
- 523 45. Whitley D. A genetic algorithm tutorial. *Stat Comput*. 1994;4:65–85.
- 524 46. Jain R, Xu W. Dynamic model updating (DMU) approach for statistical learning model building  
525 with missing data. *BMC Bioinformatics*. 2021;22:1–15.
- 526
- 527

528

Table 1: Description of the simulation data

| Models       | Scenario | $\beta$ (Non-Zero coefficients)                                                                               | $p$ | Sample Size ( $n$ ) |      | $\sigma$ |
|--------------|----------|---------------------------------------------------------------------------------------------------------------|-----|---------------------|------|----------|
|              |          |                                                                                                               |     | Train               | Test |          |
| Marginal     | 1_M      | $\{\beta_i \mid i = \{1, \dots, 10\}\} = \{0.5, -0.5, 0.5, -0.5, \dots, 0.5\}$                                | 50  | 50                  | 500  | 0.25     |
|              | 2_M      |                                                                                                               | 50  | 100                 | 500  | 0.25     |
|              | 3_M      |                                                                                                               | 100 | 75                  | 500  | 0.25     |
|              | 4_M      |                                                                                                               | 100 | 100                 | 500  | 0.25     |
| Interactions | 1_I      | $\{\beta_i, \beta_{ij} \mid i = \{1, \dots, 10\}, j = i + 1, j < 11\} = \{0.5, -0.5, 0.5, -0.5, \dots, 0.5\}$ | 15  | 100                 | 500  | 0.25     |
|              | 2_I      |                                                                                                               | 25  | 100                 | 500  | 0.25     |
|              | 3_I      |                                                                                                               | 50  | 100                 | 500  | 0.25     |

529

530

531

532



533 *Table 2: Wrapper methods comparison of computation time, target feature selection and predictive*

534 *performance*

| <i>Model</i> | <i>p</i> | <i>n</i> | Performance                |               |                                     |               |                               |               |
|--------------|----------|----------|----------------------------|---------------|-------------------------------------|---------------|-------------------------------|---------------|
|              |          |          | Computation Time (minutes) |               | Target Feature Selection (F1 Score) |               | Predictive Performance (RMSE) |               |
|              |          |          | <i>StW</i>                 | <i>AIFS-L</i> | <i>StW</i>                          | <i>AIFS-L</i> | <i>StW</i>                    | <i>AIFS-L</i> |
| 1_M          | 50       | 50       | <b>7.57</b>                | 24.85         | <b>0.48</b>                         | 0.47          | 0.55                          | <b>0.43</b>   |
| 2_M          | 50       | 100      | <b>10.68</b>               | 23.93         | <b>0.71</b>                         | 0.63          | 0.29                          | <b>0.29</b>   |
| 3_M          | 100      | 75       | <b>11.30</b>               | 18.22         | 0.29                                | <b>0.33</b>   | 0.64                          | <b>0.48</b>   |
| 4_M          | 100      | 100      | <b>31.52</b>               | 33.07         | 0.42                                | <b>0.43</b>   | 0.36                          | <b>0.36</b>   |
| 1_I          | 15       | 50       | <b>0.97</b>                | 2.18          | 0.41                                | <b>0.73</b>   | 1.20                          | <b>0.38</b>   |
| 2_I          | 25       | 50       | <b>2.72</b>                | 7.23          | 0.26                                | <b>0.39</b>   | 1.32                          | <b>0.49</b>   |

535

536

537 *Table 3: Feature selection performance of different approaches in simulated scenarios for marginal*

538 *models*

| Scenario            | Performance (Number of Features Selected) | Target Features | Existing Models |               |               |               |               | AIFS          |               |                             |
|---------------------|-------------------------------------------|-----------------|-----------------|---------------|---------------|---------------|---------------|---------------|---------------|-----------------------------|
|                     |                                           |                 | ALASSO          | LASSO         | SPLS          | Enet          | AEnet         | AIFS-L        | AIFS-LLr      | AIFS-LR                     |
| <i>Mean (Range)</i> |                                           |                 |                 |               |               |               |               |               |               |                             |
| 1_M                 | Marginal (p=50)                           | 10              | 24<br>(18-32)   | 25<br>(18-37) | 23<br>(14-35) | 27<br>(18-36) | 26<br>(21-30) | 29<br>(24-33) | 15<br>(11-22) | <b>12</b><br><b>(10-16)</b> |
| 2_M                 | Marginal (p=50)                           | 10              | 16<br>(11-35)   | 23<br>(14-40) | 16<br>(10-39) | 25<br>(14-41) | 18<br>(11-35) | 24<br>(19-31) | 16<br>(10-31) | <b>12</b><br><b>(10-16)</b> |
| 3_M                 | Marginal (p=100)                          | 10              | 27<br>(20-39)   | 32<br>(16-57) | 25<br>(12-50) | 32<br>(21-45) | 28<br>(20-43) | 44<br>(29-59) | 18<br>(10-26) | <b>14</b><br><b>(10-21)</b> |
| 4_M                 | Marginal (p=100)                          | 10              | 28<br>(14-46)   | 33<br>(14-55) | 19<br>(11-47) | 32<br>(17-55) | 30<br>(15-48) | 44<br>(34-51) | 19<br>(10-45) | <b>13</b><br><b>(10-22)</b> |

539

540

541 *Table 4: Feature selection performance of different approaches in simulated scenarios for interaction*

542 *models*

| Scenario | Performance (Number of Features Selected) | Target Features | Existing Models     |               |                            |                 |               |               | AIFS                        |                             |                             |
|----------|-------------------------------------------|-----------------|---------------------|---------------|----------------------------|-----------------|---------------|---------------|-----------------------------|-----------------------------|-----------------------------|
|          |                                           |                 | ALASSO              | GLASSO        | LASSO                      | SPLS            | Enet          | AEnet         | AIFS-L                      | AIFS-LLr                    | AIFS-LR                     |
|          |                                           |                 | <i>Mean (Range)</i> |               |                            |                 |               |               |                             |                             |                             |
| 1_       | Marginal (p=15)                           | 10              | 15<br>(15-15)       | 15<br>(14-15) | 15<br>(15-15)              | 14<br>(12-15)   | 15<br>(15-15) | 15<br>(15-15) | <b>12</b><br><b>(12-14)</b> | <b>12</b><br><b>(12-14)</b> | <b>12</b><br><b>(12-14)</b> |
|          | Interaction ( $\chi=105$ )                | 9               | 31<br>(20-41)       | 40<br>(22-51) | 33<br>(18-49)              | 36<br>(16-102)  | 34<br>(21-44) | 32<br>(24-41) | 34<br>(20-47)               | <b>30</b><br><b>(8-44)</b>  | 34<br>(20-47)               |
| 2_       | Marginal (p=25)                           | 10              | 24<br>(22-25)       | 25<br>(24-25) | 24<br>(22-25)              | 19<br>(9-25)    | 22<br>(14-25) | 24<br>(22-25) | 18<br>(14-21)               | <b>16</b><br><b>(10-20)</b> | 18<br>(14-21)               |
|          | Interaction ( $\chi=300$ )                | 9               | 46<br>(32-67)       | 66<br>(39-74) | 45<br>(30-65)              | 65<br>(6-287)   | 39<br>(11-60) | 44<br>(31-64) | 50<br>(26-60)               | <b>36</b><br><b>(5-47)</b>  | 50<br>(26-60)               |
| 3_       | Marginal (p=50)                           | 10              | 32<br>(2-45)        | 47<br>(45-49) | <b>16</b><br><b>(1-45)</b> | 38<br>(6-50)    | 29<br>(2-50)  | 37<br>(2-49)  | 29<br>(27-32)               | 24<br>(8-30)                | 28<br>(24-30)               |
|          | Interaction ( $\chi=1225$ )               | 9               | 36<br>(1-67)        | 76<br>(72-81) | <b>16</b><br><b>(0-71)</b> | 417<br>(1-1057) | 36<br>(1-116) | 53<br>(1-104) | 85<br>(71-99)               | 30<br>(2-52)                | 46<br>(26-88)               |

543

544

545 *Table 5: Outcome prediction performance of different approaches in simulated scenarios for the test*

546 *dataset*

| Methods         | Performance (RMSE)                    |                                   |                                   |                                   |                                   |                                   |                                   |
|-----------------|---------------------------------------|-----------------------------------|-----------------------------------|-----------------------------------|-----------------------------------|-----------------------------------|-----------------------------------|
|                 | Marginal Model Scenarios              |                                   |                                   |                                   | Interaction Model Scenarios       |                                   |                                   |
|                 | 1_M                                   | 2_M                               | 3_M                               | 4_M                               | 1_I                               | 2_I                               | 3_I                               |
|                 | <i>Mean (95% Confidence Interval)</i> |                                   |                                   |                                   |                                   |                                   |                                   |
| <b>ALASSO</b>   | 0.44<br>(0.35-0.54)                   | 0.28<br>(0.23-0.33)               | 0.39<br>(0.32-0.46)               | 0.30<br>(0.26-0.35)               | 0.44<br>(0.36-0.52)               | 0.94<br>(0.74-1.13)               | 1.36<br>(1.31-1.41)               |
| <b>GLASSO</b>   |                                       |                                   |                                   |                                   | 0.36<br>(0.3-0.43)                | 0.65<br>(0.51-0.80)               | <b>1.20</b><br><b>(1.15-1.26)</b> |
| <b>LASSO</b>    | 0.45<br>(0.36-0.54)                   | 0.29<br>(0.24-0.34)               | 0.40<br>(0.33-0.47)               | 0.31<br>(0.26-0.36)               | 0.40<br>(0.33-0.47)               | 0.94<br>(0.76-1.13)               | 1.36<br>(1.32-1.40)               |
| <b>SPLS</b>     | 0.45<br>(0.35-0.55)                   | 0.26<br>(0.21-0.31)               | 0.43<br>(0.28-0.58)               | 0.27<br>(0.23-0.31)               | 0.52<br>(0.38-0.66)               | 1.33<br>(1.21-1.45)               | 1.47<br>(1.38-1.56)               |
| <b>Enet</b>     | 0.45<br>(0.36-0.53)                   | 0.29<br>(0.24-0.35)               | 0.42<br>(0.34-0.5)                | 0.32<br>(0.27-0.36)               | 0.41<br>(0.34-0.49)               | 1.02<br>(0.82-1.22)               | 1.34<br>(1.29-1.38)               |
| <b>AEnet</b>    | 0.46<br>(0.35-0.57)                   | 0.28<br>(0.23-0.33)               | 0.41<br>(0.33-0.48)               | 0.31<br>(0.26-0.35)               | 0.46<br>(0.38-0.54)               | 0.97<br>(0.79-1.15)               | 1.34<br>(1.30-1.39)               |
| <b>AIFS-L</b>   | 0.51<br>(0.38-0.65)                   | 0.28<br>(0.23-0.32)               | 0.43<br>(0.34-0.52)               | 0.31<br>(0.26-0.36)               | <b>0.36</b><br><b>(0.29-0.43)</b> | <b>0.50</b><br><b>(0.40-0.61)</b> | 1.43<br>(1.30-1.57)               |
| <b>AIFS-LLr</b> | <b>0.41</b><br><b>(0.26-0.56)</b>     | <b>0.26</b><br><b>(0.21-0.31)</b> | <b>0.33</b><br><b>(0.27-0.39)</b> | <b>0.27</b><br><b>(0.22-0.32)</b> | 0.39<br>(0.31-0.48)               | 0.58<br>(0.39-0.77)               | 1.44<br>(1.33-1.55)               |
| <b>AIFS-LR</b>  | 0.46<br>(0.33-0.58)                   | 0.30<br>(0.26-0.33)               | 0.34<br>(0.30-0.38)               | 0.29<br>(0.26-0.33)               | 0.56<br>(0.48-0.65)               | 0.79<br>(0.68-0.91)               | 1.35<br>(1.28-1.41)               |

547

548

549

*Table 6: Summary of the real datasets*

| Real Studies     | Marginal Features (p) | Outcome feature              | Sample size (n) |       |      |
|------------------|-----------------------|------------------------------|-----------------|-------|------|
|                  |                       |                              | Total           | Train | Test |
| <i>Study I</i>   | 44                    | Percentage of unhealthy days | 1471            | 294   | 1177 |
| <i>Study II</i>  | 19                    | Height                       | 1287            | 257   | 1030 |
| <i>Study III</i> | 33                    | Height                       | 943             | 189   | 754  |
| <i>Study IV</i>  | 26                    | Body Mass Index              | 1406            | 281   | 1125 |

550

551

552

Table 7: Number of features selected by different wrapper methods on the real studies

| Real Studies              | Performance<br>(Number of Features<br>Selected) | Existing Models           |                  |                            |                            |                           | AIFS                     |               |                          |
|---------------------------|-------------------------------------------------|---------------------------|------------------|----------------------------|----------------------------|---------------------------|--------------------------|---------------|--------------------------|
|                           |                                                 | ALASSO                    | GLASSO           | LASSO                      | SPLS                       | Enet                      | AEnet                    | AIFS-L        | AIFS-LLr                 |
|                           |                                                 | <i>Mean (Range)</i>       |                  |                            |                            |                           |                          |               |                          |
| <i>Marginal Models</i>    |                                                 |                           |                  |                            |                            |                           |                          |               |                          |
| I                         | Marginal<br>(p=44)                              | <b>7</b><br><b>(4-14)</b> |                  | <b>7</b><br><b>(3-16)</b>  | 23<br>(3-44)               | 13<br>(4-22)              | 11<br>(4-21)             | 13<br>(7-21)  | 10<br>(5-16)             |
|                           | Marginal<br>(p=19)                              | <b>5</b><br><b>(1-10)</b> |                  | 7<br>(1-12)                | 9<br>(1-15)                | 8<br>(1-15)               | 7<br>(1-12)              | 9<br>(4-13)   | 6<br>(3-9)               |
| III                       | Marginal<br>(p=33)                              | <b>8</b><br><b>(4-11)</b> |                  | 12<br>(6-16)               | 11<br>(4-33)               | 13<br>(5-18)              | 10<br>(4-18)             | 13<br>(10-18) | 9<br>(4-13)              |
| IV                        | Marginal<br>(p=26)                              | 6<br>(5-7)                |                  | 7<br>(5-9)                 | 7<br>(5-14)                | 8<br>(5-11)               | 7<br>(5-12)              | 7<br>(5-9)    | <b>5</b><br><b>(3-9)</b> |
| <i>Interaction Models</i> |                                                 |                           |                  |                            |                            |                           |                          |               |                          |
| I                         | Marginal<br>(p=44)                              | 13<br>(7-24)              | 42<br>(41-43)    | <b>12</b><br><b>(7-23)</b> | <b>12</b><br><b>(3-44)</b> | 22<br>(10-36)             | 21<br>(7-32)             | 21<br>(15-26) | 20<br>(14-26)            |
|                           | Interaction<br>( $\chi = 946$ )                 | <b>4</b><br><b>(1-11)</b> | 170<br>(156-183) | <b>4</b><br><b>(0-11)</b>  | 63<br>(0-591)              | 13<br>(1-46)              | 11<br>(0-23)             | 23<br>(8-47)  | 17<br>(5-35)             |
| II                        | Marginal<br>(p=19)                              | 10<br>(2-18)              | 19<br>(19-19)    | <b>9</b><br><b>(1-16)</b>  | 11<br>(1-19)               | <b>9</b><br><b>(1-15)</b> | 10<br>(1-16)             | 12<br>(9-15)  | 10<br>(1-14)             |
|                           | Interaction<br>( $\chi = 171$ )                 | 6<br>(0-19)               | 94<br>(87-108)   | <b>4</b><br><b>(0-8)</b>   | 24<br>(0-117)              | 6<br>(0-21)               | 6<br>(0-14)              | 15<br>(5-37)  | 8<br>(0-13)              |
| III                       | Marginal<br>(p=33)                              | 15<br>(6-26)              | 33<br>(32-33)    | 15<br>(3-23)               | <b>4</b><br><b>(1-10)</b>  | 14<br>(4-23)              | 16<br>(10-23)            | 16<br>(10-21) | 15<br>(2-21)             |
|                           | Interaction<br>( $\chi = 528$ )                 | 6<br>(1-25)               | 125<br>(113-137) | 5<br>(0-16)                | <b>1</b><br><b>(0-4)</b>   | 4<br>(0-16)               | 5<br>(1-15)              | 22<br>(1-49)  | 19<br>(1-49)             |
| IV                        | Marginal<br>(p=26)                              | 5<br>(3-6)                | 7<br>(5-9)       | 6<br>(3-9)                 | 9<br>(6-12)                | 7<br>(4-10)               | <b>5</b><br><b>(3-6)</b> | 10<br>(6-13)  | 10<br>(6-13)             |
|                           | Interaction<br>( $\chi = 299$ )                 | 3<br>(1-4)                | 7<br>(5-10)      | 4<br>(2-6)                 | 12<br>(7-16)               | 5<br>(2-7)                | <b>3</b><br><b>(1-5)</b> | 13<br>(7-26)  | 13<br>(7-26)             |

553

554

555

Table 8: RMSE performance of different methods on the real studies for test data

| Methods         | Performance (RMSE)                    |                                   |                                   |                                   |
|-----------------|---------------------------------------|-----------------------------------|-----------------------------------|-----------------------------------|
|                 | Marginal Model Scenarios              |                                   |                                   |                                   |
|                 | <i>I</i>                              | <i>II</i>                         | <i>III</i>                        | <i>IV</i>                         |
|                 | <b>Mean (95% Confidence Interval)</b> |                                   |                                   |                                   |
| <i>ALASSO</i>   | 0.95<br>(0.95-0.96)                   | 3.76<br>(3.67-3.84)               | 3.08<br>(3.01-3.14)               | 0.86<br>(0.81-0.90)               |
| <i>LASSO</i>    | 0.96<br>(0.95-0.97)                   | 3.75<br>(3.65-3.85)               | 3.10<br>(3.03-3.16)               | 0.84<br>(0.8-0.87)                |
| <i>SPLS</i>     | 0.97<br>(0.95-0.99)                   | 3.61<br>(3.54-3.69)               | 3.35<br>(3.03-3.66)               | 0.77<br>(0.76-0.79)               |
| <i>Enet</i>     | 0.95<br>(0.94-0.96)                   | 3.79<br>(3.7-3.87)                | 3.15<br>(3.08-3.23)               | 0.85<br>(0.81-0.90)               |
| <i>AEnet</i>    | 0.96<br>(0.94-0.97)                   | 3.76<br>(3.67-3.85)               | 3.11<br>(3.07-3.15)               | 0.84<br>(0.8-0.87)                |
| <i>AIFS-L</i>   | <b>0.94</b><br><b>(0.93-0.94)</b>     | 3.65<br>(3.59-3.71)               | 3.02<br>(2.98-3.06)               | 0.83<br>(0.8-0.86)                |
| <i>AIFS-LLr</i> | 0.96<br>(0.94-0.97)                   | <b>3.59</b><br><b>(3.55-3.64)</b> | <b>2.97</b><br><b>(2.91-3.03)</b> | <b>0.75</b><br><b>(0.73-0.78)</b> |
| <i>AIFS-LR</i>  | 0.95<br>(0.94-0.96)                   | 3.80<br>(3.72-3.87)               | 3.19<br>(3.11-3.28)               | 1.20<br>(1.17-1.24)               |
| Methods         | Interaction Model Scenarios           |                                   |                                   |                                   |
|                 | <i>I</i>                              | <i>II</i>                         | <i>III</i>                        | <i>IV</i>                         |
|                 | <b>Mean (95% Confidence Interval)</b> |                                   |                                   |                                   |
| <i>ALASSO</i>   | 0.94<br>(0.93-0.95)                   | 3.69<br>(3.61-3.76)               | 3.12<br>(3.02-3.23)               | 0.52<br>(0.49-0.55)               |
| <i>GLASSO</i>   | 1.44<br>(1.2-1.68)                    | 4.46<br>(4.35-4.57)               | 8.24<br>(5.37-11.11)              | 0.31<br>(0.28-0.34)               |
| <i>LASSO</i>    | 0.95<br>(0.94-0.96)                   | 3.74<br>(3.67-3.81)               | 3.15<br>(3.02-3.27)               | 0.43<br>(0.39-0.47)               |
| <i>SPLS</i>     | 1.03<br>(0.91-1.15)                   | 3.81<br>(3.76-3.86)               | 4.34<br>(3.26-5.42)               | <b>0.24</b><br><b>(0.22-0.26)</b> |
| <i>Enet</i>     | 0.94<br>(0.93-0.95)                   | 3.78<br>(3.72-3.84)               | 3.24<br>(3.13-3.34)               | 0.44<br>(0.4-0.48)                |
| <i>AEnet</i>    | 0.93<br>(0.92-0.94)                   | 3.73<br>(3.65-3.81)               | 3.14<br>(3.06-3.21)               | 0.53<br>(0.5-0.56)                |
| <i>AIFS-L</i>   | 0.94<br>(0.92-0.95)                   | <b>3.58</b><br><b>(3.53-3.63)</b> | <b>3.07</b><br><b>(2.98-3.17)</b> | 0.29<br>(0.26-0.33)               |
| <i>AIFS-LLr</i> | 1.04<br>(0.99-1.1)                    | 3.76<br>(3.58-3.93)               | 3.65<br>(3.26-4.04)               | 0.26<br>(0.21-0.31)               |
| <i>AIFS-LR</i>  | <b>0.93</b><br><b>(0.92-0.94)</b>     | 3.70<br>(3.64-3.76)               | 3.22<br>(3.18-3.26)               | 1.11<br>(0.99-1.24)               |

556

557

558

*Table 9: Summary of the genomic datasets*

| <b>Datasets</b> | <b>Number of cigarettes smoked per day<br/>(<math>\mu(\sigma)</math>)</b> | <b>Sample Size<br/>(n)</b> | <b>Feature Space<br/>(p)</b> |
|-----------------|---------------------------------------------------------------------------|----------------------------|------------------------------|
| TCGA-BLCA       | 1.16 (2.34)                                                               | 433                        | 56602                        |
| TCGA-CESC       | 0.30 (0.62)                                                               | 307                        | 56602                        |
| TCGA-ESCA       | 0.95 (1.21)                                                               | 172                        | 56602                        |
| TCGA-HNSC       | 1.41 (1.89)                                                               | 544                        | 56602                        |
| TCGA-KICH       | 0.21 (0.67)                                                               | 89                         | 56602                        |
| TCGA-KIRP       | 0.42 (1.04)                                                               | 320                        | 56602                        |
| TCGA-LUAD       | 1.53 (1.59)                                                               | 592                        | 56602                        |
| TCGA-LUSC       | 2.44 (1.88)                                                               | 551                        | 56602                        |
| TCGA-PAAD       | 0.46 (0.88)                                                               | 181                        | 56602                        |

559

560



561 *Table 10: Wrapper methods comparison of predictive performance, number of genes selected and*  
 562 *computation time*

| <i>Dataset</i> | Performance ( $\mu$ [95% CI])* |                        |                          |                  |                            |                       |
|----------------|--------------------------------|------------------------|--------------------------|------------------|----------------------------|-----------------------|
|                | Predictive Performance (RMSE)  |                        | Number of Genes Selected |                  | Computation Time (minutes) |                       |
|                | <i>StW</i>                     | <i>AIFS-L</i>          | <i>StW</i>               | <i>AIFS-L</i>    | <i>StW</i>                 | <i>AIFS-L</i>         |
| TCGA-BLCA      | 0.79[0.31,1.27]                | <b>0.78[0.30,1.26]</b> | 4[0,9]                   | <b>1[0,3]</b>    | <b>5.9[3.2,8.6]</b>        | 12.2[10.1,14.3]       |
| TCGA-CESC      | 1.00[0.84,1.16]                | <b>0.98[0.84,1.13]</b> | 10[7,13]                 | <b>5[4,6]</b>    | <b>11[7.7,14.2]</b>        | 14.6[9.9,19.3]        |
| TCGA-ESCA      | 1.04[0.87,1.20]                | <b>1.00[0.85,1.15]</b> | 11[5,17]                 | <b>8[2,14]</b>   | <b>7.2[4.9,9.5]</b>        | 27.9[3.6,52.2]        |
| TCGA-HNSC      | 0.99[0.82,1.16]                | <b>0.98[0.81,1.15]</b> | 16[12,20]                | <b>6[3,9]</b>    | <b>11.4[8.7,14]</b>        | 20.3[9.3,31.2]        |
| TCGA-KICH      | 1.03[0.61,1.46]                | <b>0.82[0.39,1.25]</b> | 11[9,13]                 | <b>6[4,8]</b>    | 50.2[24.7,75.7]            | <b>10.6[7.5,13.7]</b> |
| TCGA-KIRP      | 0.95[0.66,1.24]                | <b>0.95[0.65,1.24]</b> | 19[18,20]                | <b>15[11,19]</b> | <b>10.4[8.8,12]</b>        | 41.1[12.5,69.8]       |
| TCGA-LUAD      | 1.02[0.93,1.11]                | <b>1.02[0.94,1.09]</b> | 25[22,28]                | <b>21[16,26]</b> | <b>11.6[9.1,14.1]</b>      | 42.3[11.6,72.9]       |
| TCGA-LUSC      | 0.99[0.91,1.08]                | <b>0.99[0.91,1.08]</b> | 2[1,3]                   | <b>1[0,2]</b>    | <b>5.7[4.4,7]</b>          | 12[8.8,15.2]          |
| TCGA-PAAD      | 1.26[0.74,1.79]                | <b>1.24[0.75,1.73]</b> | 22[20,24]                | <b>14[9,19]</b>  | <b>10.8[7.6,14.1]</b>      | 29[0.6,57.4]          |

563

564

565 Figure 1: Comparison of different methods' feature selection performance in marginal models a)  
566 Frequency of selection of target and noise features. b) AUC for predicting the target and noise  
567 features.

568 Figure 2: Feature selection performance comparison of different methods in interaction models a)  
569 Frequency of selection of target and noise features. b) AUC for predicting the target and noise  
570 features.

571 Figure 3: Flow chart of A) Standard wrapper approach and B) Proposed wrapper (AIFS) conceptual  
572 approach.

573 Figure 4: AIFS algorithm graphical flow chart. Dark Background represents main steps and light  
574 background represents sub-steps.

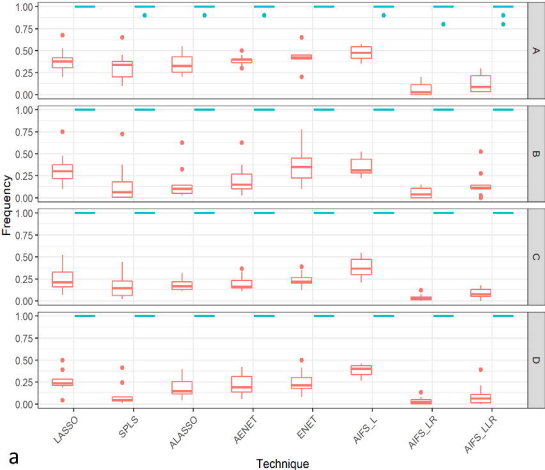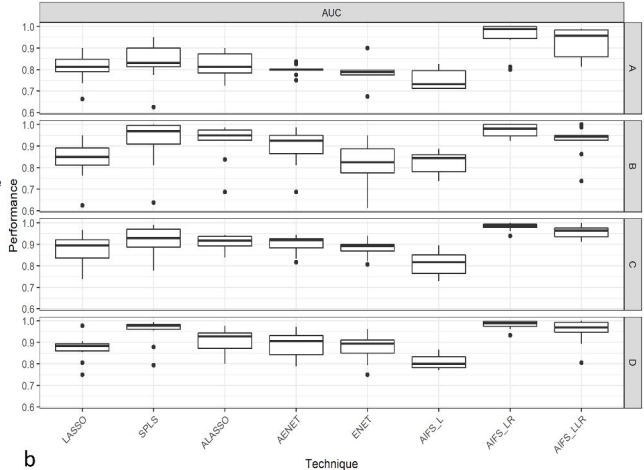

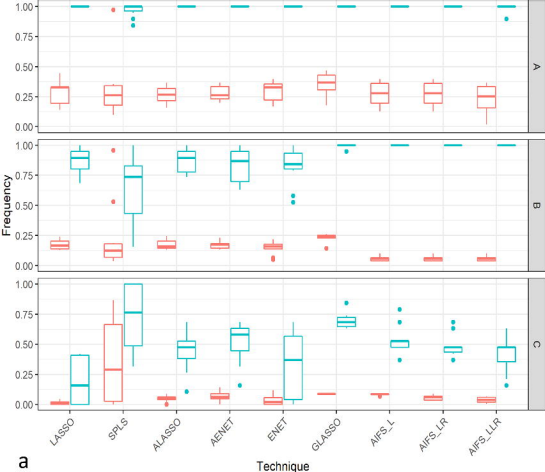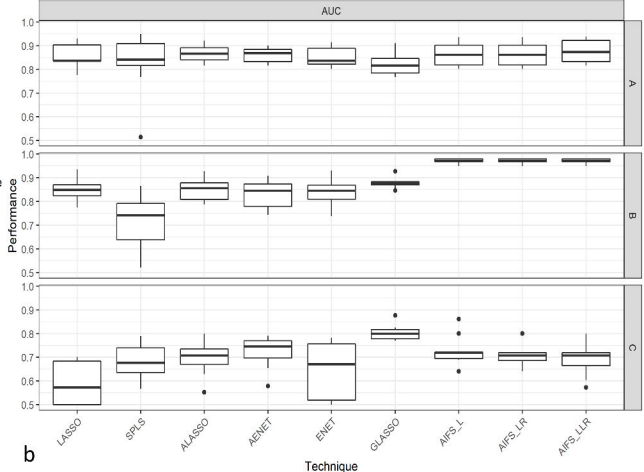

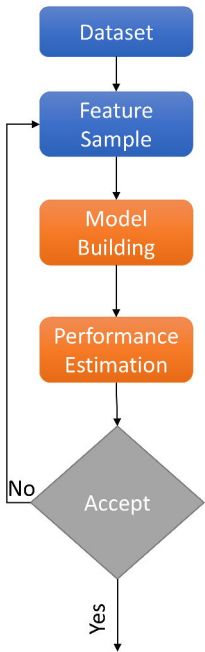

A: Standard Wrapper Approach

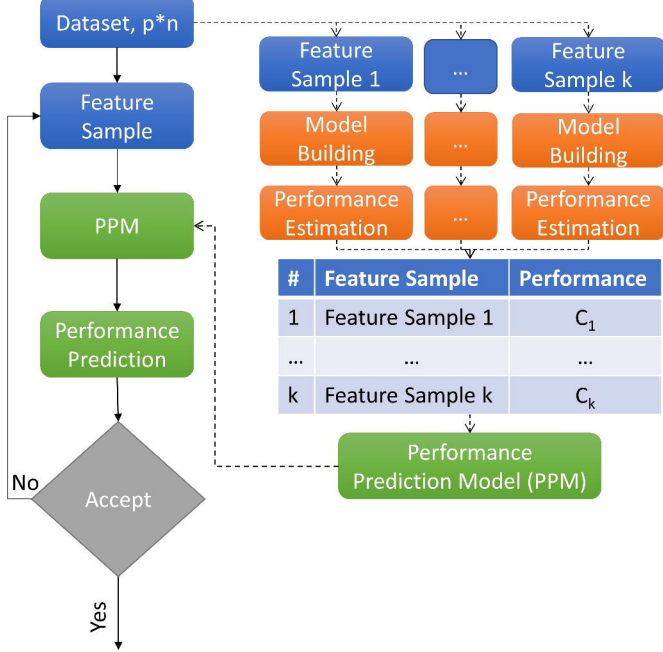

B: AIFS Approach

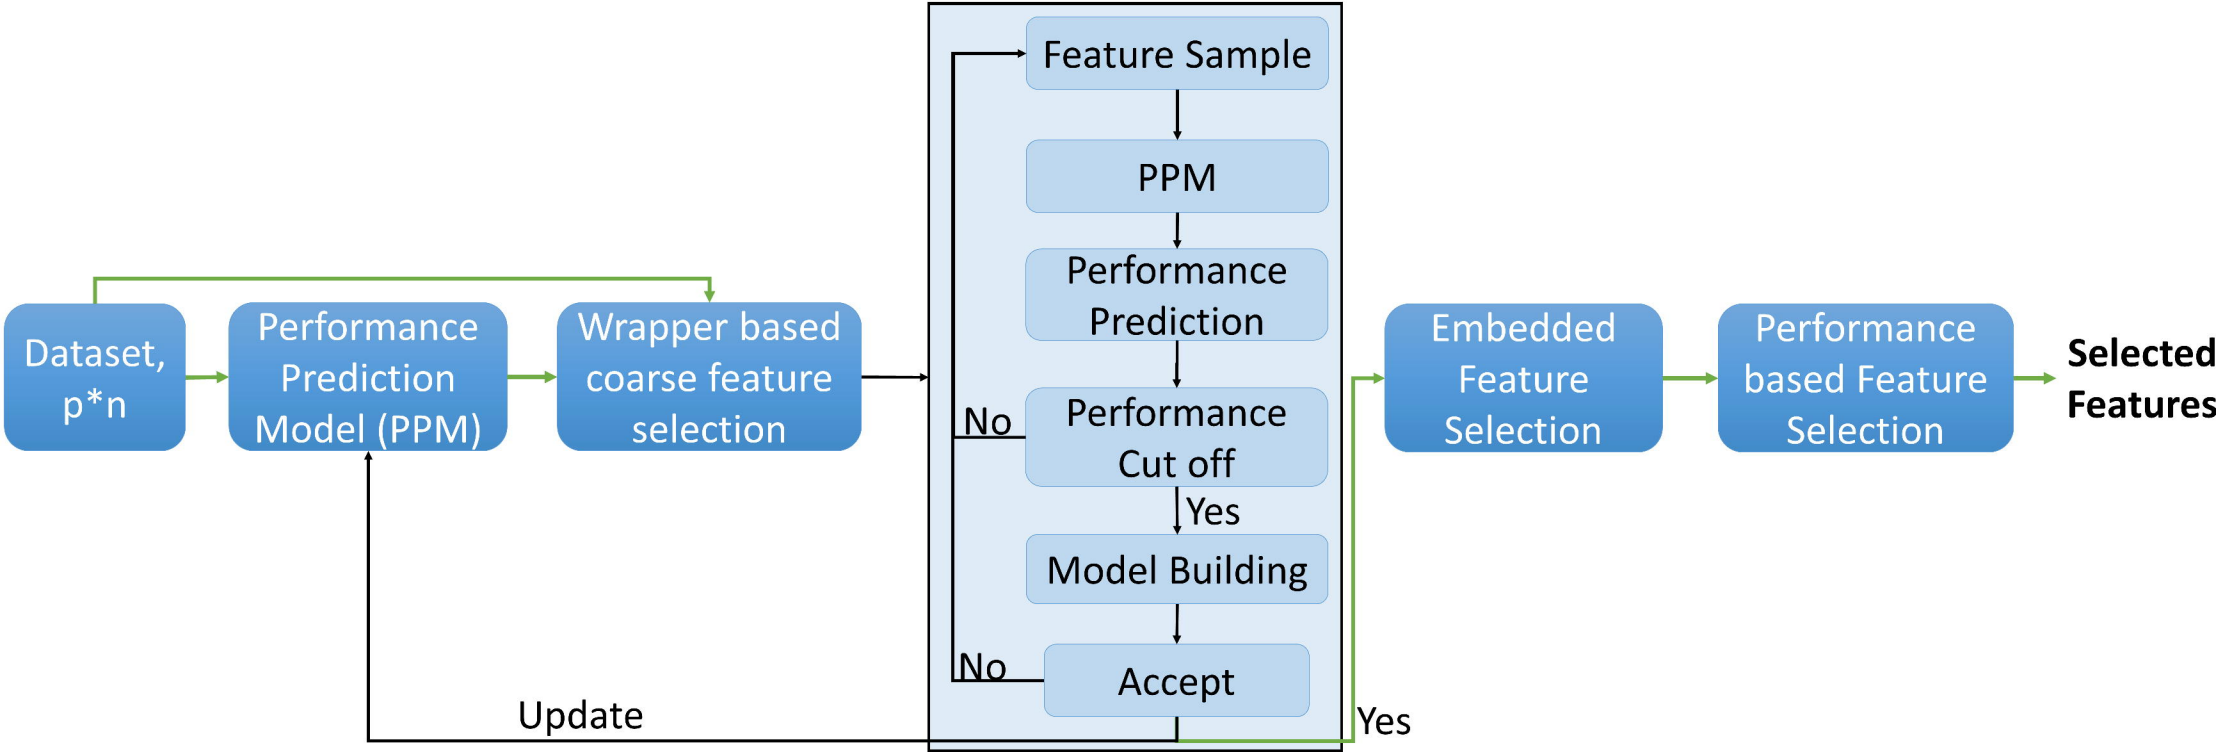

Source: https://www.biorxiv.org/content/10.1101/2022.07.21.501053v1.full.pdf
